# Supplementary material
Source: PubMed Central journal article supplement (PMC3574286)

Suppl. Fig. 1

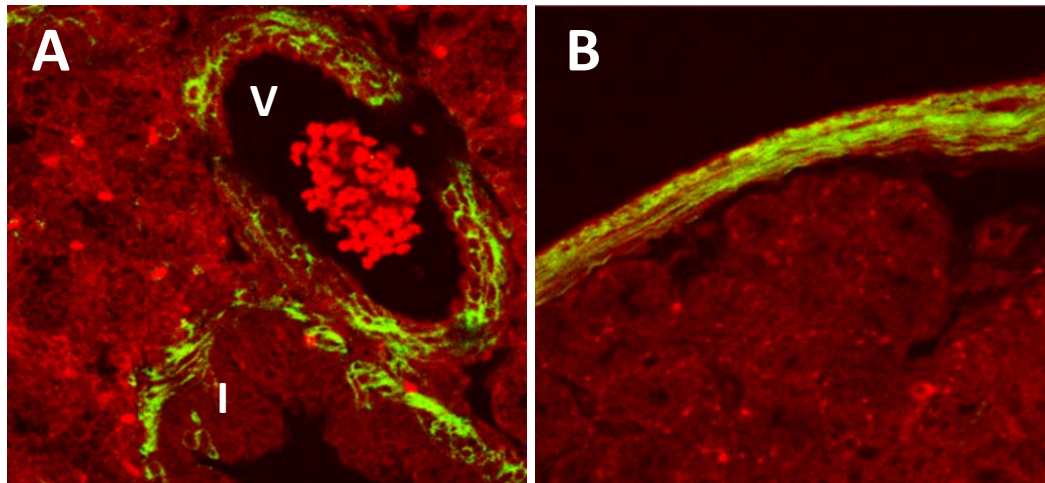

Supplement: fj.12-215293.sf1.pdf [file fj.12-215293.sf1.pdf]

Suppl. Fig. 2

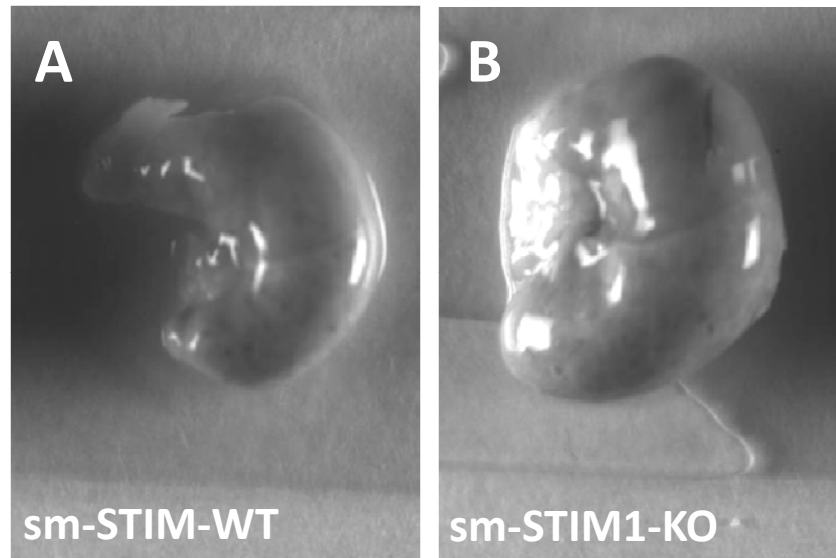

Supplement: fj.12-215293.sf2.pdf [file fj.12-215293.sf2.pdf]

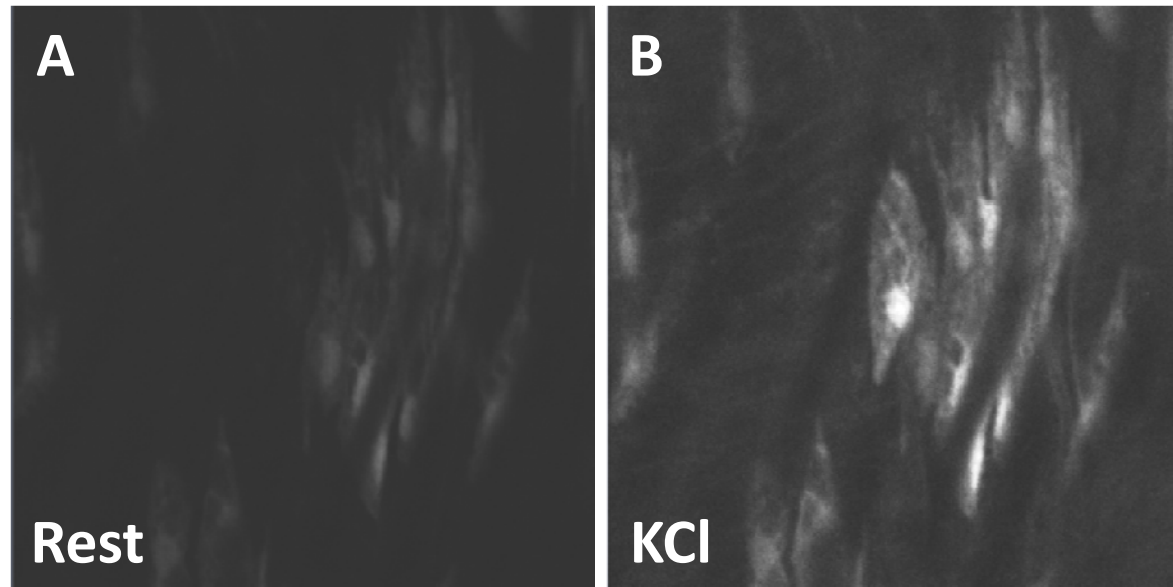

Supplement: fj.12-215293.sf3.pdf [file fj.12-215293.sf3.pdf]
